# Supplementary material for: β-Catenin Elicits Drp1-Mediated Mitochondrial Fission Activating the Pro-Apoptotic Caspase-1/IL-1β Signalosome in Aeromonas hydrophila-Infected Zebrafish Macrophages
Source: MDPI journal article supplement (doi:10.3390/cells12111509), 2023-05-30
Supplement: s1 [file s1]

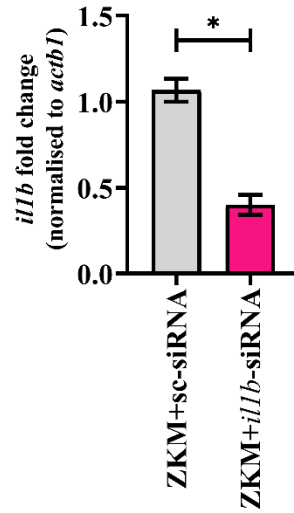

**Figure S1.** Transfection of *il1b* siRNA attenuates *il1b* expression in ZKM. ZKM transfected with sc-siRNA and *il1b* siRNA and *il1b* expression was studied using RT-qPCR. Vertical bars represent mean  $\pm$  SEM (n=3). Asterisk represents significant difference between indicated groups (\* $p$ <0.05).

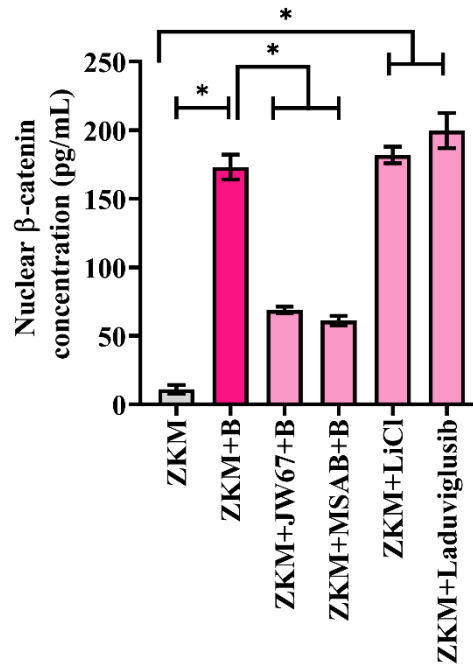

**Figure S2.** Effect of JW67, MSAB, LiCl and Laduviglusib on the nuclear translocation of  $\beta$ -catenin in ZKM. ZKM pre-treated with or without  $\beta$ -catenin inhibitors (JW67 and MSAB) for 1 h were infected with *A. hydrophila* and at 6 h p.i., nuclear  $\beta$ -catenin levels were measured using CTNN $\beta$ 1 ELISA Kit. Similarly, ZKM were pre-treated with LiCl and Laduviglusib for 1 h and at 6 h p.i., nuclear  $\beta$ -catenin levels were measured. Vertical bars denote mean  $\pm$  SEM (n=3). Asterisk (\*) denotes significant difference between indicated groups (\* $p$ <0.05). "+ B" mentioned in X axis represents "+ *A. hydrophila*".

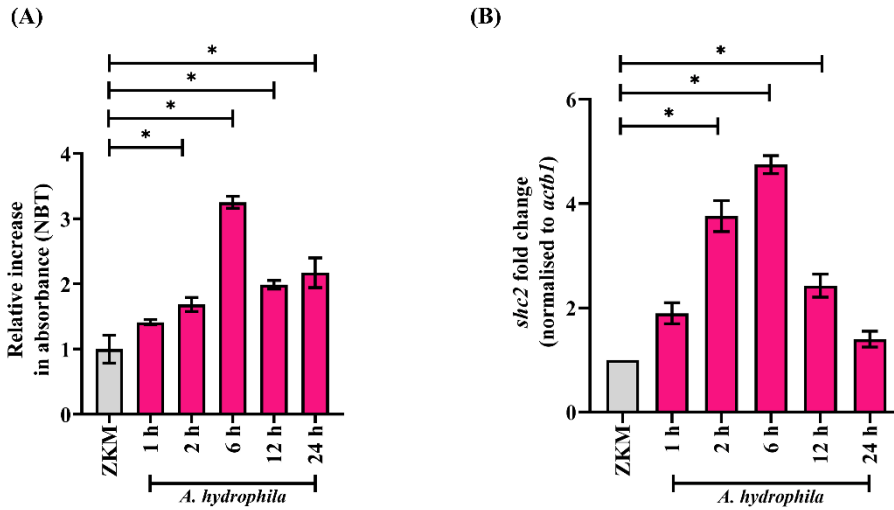

**Figure S3.** *A. hydrophila*-infected ZKM shows enhanced ROS generation and *shc2* mRNA expression. ZKM were infected with *A. hydrophila* and (A) superoxide generation was recorded at indicated time points p.i. using NBT assay, and (B) *shc2* mRNA expression was analysed by RT-qPCR at indicated time points p.i. Vertical bars denote mean  $\pm$  SEM (n=3). Asterisk (\*) denotes significant difference between indicated groups (\* $p$ <0.05).

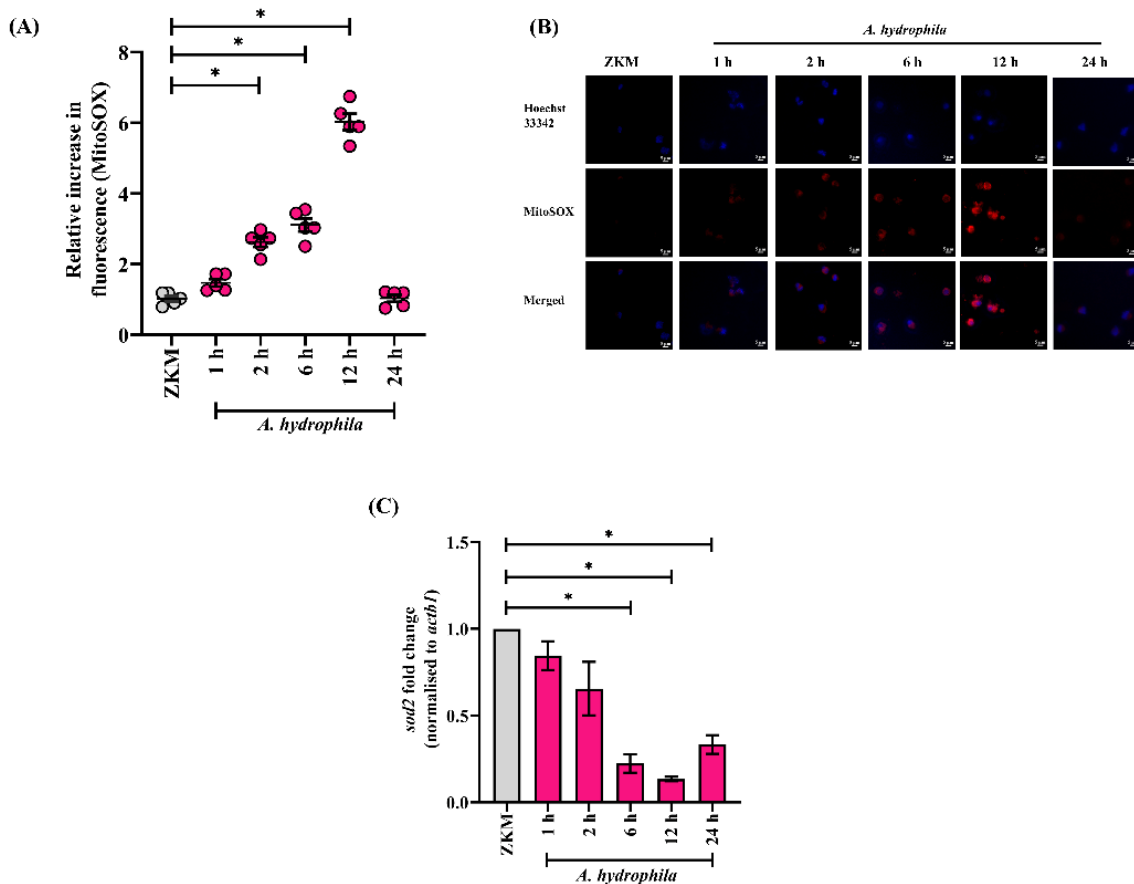

**Figure S4.** *A. hydrophila* infection induces mtROS production and downregulates *sod2* mRNA expression in ZKM. ZKM were infected with *A. hydrophila* and at indicated time points p.i., mtROS production was studied using MitoSOX (A) by fluorimeter, and (B) using fluorescence microscope. Fluorescence microscopic data is representative of three independent experiments (Scale- 5  $\mu$ m). (C) ZKM were infected with *A. hydrophila* and at

indicated time points p.i., *sod2* mRNA expression were analysed using RT-qPCR. Vertical bars denote mean  $\pm$  SEM (n=3). Asterisk (\*) denotes significant difference between indicated groups (\* $p$ <0.05).

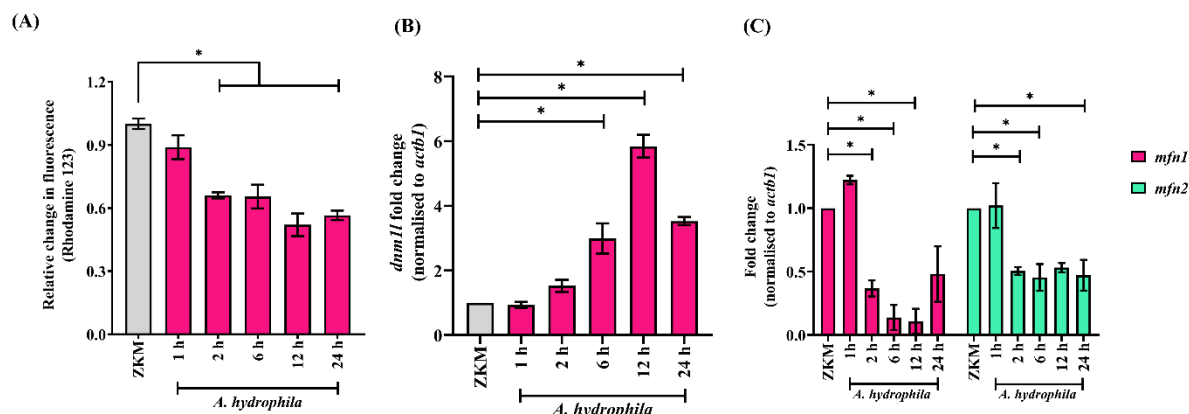

**Figure S5.** *A. hydrophila* infection induces  $\Delta\Psi_m$  loss, upregulates *dnm1l* mRNA expression and downregulates *mfn1* and *mfn2* mRNA expression in ZKM. ZKM were infected with *A. hydrophila* and at indicated time points p.i., (A)  $\Delta\Psi_m$  change was studied using Rhodamine 123, (B) *dnm1l* and (C) *mfn1* and *mfn2* mRNA expression were analysed using RT-qPCR. Vertical bars denote mean  $\pm$  SEM (n=3). Asterisk (\*) denotes significant difference between indicated groups (\* $p$ <0.05).

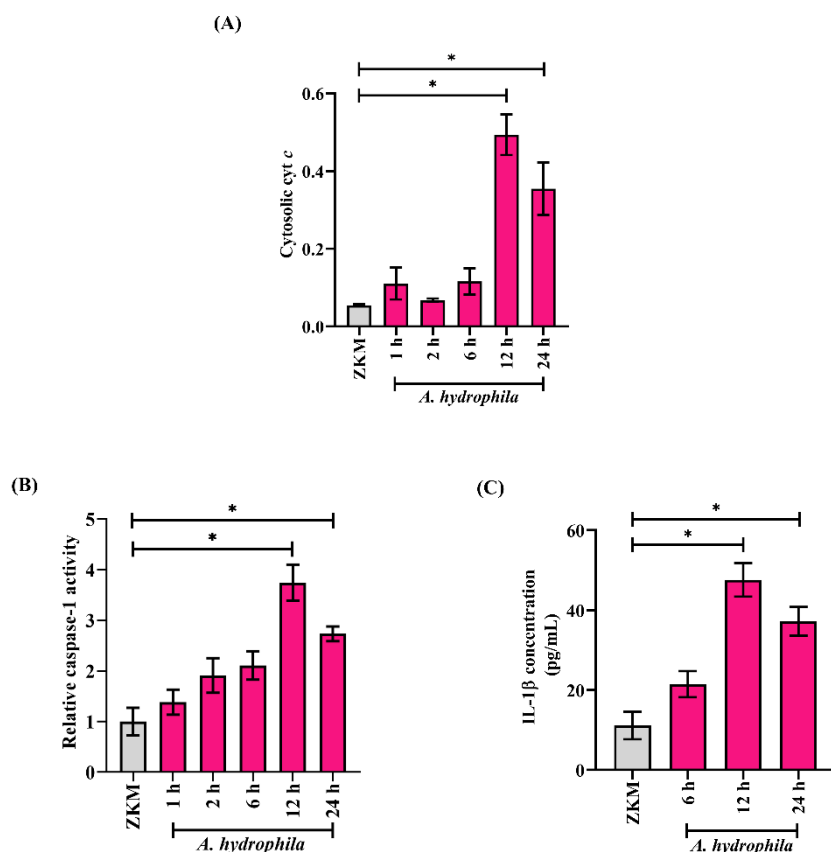

**Figure S6.** *A. hydrophila* infection induces cyt c release into cytosol and upregulates caspase-1 activity and IL-1 $\beta$  production in ZKM. ZKM were infected with *A. hydrophila* and (A) cytosolic cyt c levels were measured at indicated time points p.i., (B) relative changes in caspase-1 activity were measured at indicated time points p.i., and (C) IL-1 $\beta$  concentrations were measured at indicated time points p.i. Vertical bars represent mean  $\pm$  SEM (n=3). Asterisk (\*) denotes significant difference between indicated groups (\* $p$ <0.05).
